# Supplementary material
Source: Research Square preprint supplement (doi:10.21203/rs.3.rs-10330665/v1)
Supplement: Supplementary file 1 [file 05be2b729c9a78c55ae5a783.docx]

# PRISMA 2020 Checklist

Systematic Review: **Sodium-Glucose Cotransporter-2 Inhibitors and Cutaneous Adverse Reactions: A Systematic Review of Clinical Phenotypes, Time-to-Onset Profiles, and Management Strategies (2020–2026)**

| Item | Section | Reported | Location |
| --- | --- | --- | --- |
| 1 | Title | Yes | Title page |
| 2 | Abstract | Yes | Abstract section |
| 3 | Rationale | Yes | Introduction, paragraphs 1–2 |
| 4 | Objectives | Yes | Introduction, final paragraph |
| 5 | Eligibility criteria | Yes | Methods 2.3 |
| 6 | Information sources | Yes | Methods 2.2 |
| 7 | Search strategy | Yes | Methods 2.2 + Supplementary File 3 |
| 8 | Selection process | Yes | Methods 2.4 |
| 9 | Data collection process | Yes | Methods 2.4 |
| 10 | Data items | Yes | Methods 2.4 |
| 11 | Risk of bias assessment | Yes | Methods 2.5 + Supplementary File 4 |
| 12 | Effect measures | Yes | Methods 2.6 |
| 13 | Synthesis methods | Yes | Methods 2.6 |
| 14 | Certainty assessment | Yes | Methods 2.6 |
| 15 | Study selection | Yes | Results 3.1 + Supplementary File 2 |
| 16 | Study characteristics | Yes | Results 3.1 |
| 17 | Risk of bias in studies | Yes | Supplementary File 4 |
| 18 | Results of individual studies | Yes | Results 3.3–3.5 |
| 19 | Synthesis of results | Yes | Results 3.3–3.5 |
| 20 | Certainty of evidence | Yes | Discussion 4.3 |
| 21 | Interpretation | Yes | Discussion 4.1–4.2 |
| 22 | Limitations | Yes | Discussion 4.3 |
| 23 | Conclusions | Yes | Conclusion |
| 24 | Registration | Yes | Methods 2.1 |
| 25 | Competing interests | Yes | Conflict of Interest |
| 26 | Funding | Yes | Funding |
| 27 | Data availability | Yes | Supplementary Files 1–4 |
