# Supplementary material
Source: Research Square preprint supplement (doi:10.21203/rs.3.rs-10330665/v1)
Supplement: Supplementary file 2 [file 0fe4ce21ca518f383eb0aac4.docx]

# Supplementary File 2 PRISMA 2020 Flow Diagram

PRISMA 2020 flow summary

| Field | Value |
| --- | --- |
| Databases identified | 1203 |
| Other sources | 0 |
| After duplicates | 847 |
| Screened | 847 |
| Excluded | 723 |
| Full-text assessed | 124 |
| Full-text excluded | 82 |
| - Not original data | 34 |
| - No explicit SGLT2i CARs | 28 |
| - Duplicate cohorts | 12 |
| - Non-English | 8 |
| Included studies | 42 |
| Meta-analysis | 0 (not applicable) |

Figure 1. PRISMA 2020 flow diagram showing the study selection process for the systematic review of SGLT2 inhibitor-induced cutaneous adverse reactions.
