# Supplementary material
Source: Research Square preprint supplement (doi:10.21203/rs.3.rs-10330665/v1)
Supplement: Supplementary file 3 [file 43cfe94e11023b0920e5c95e.docx]

# Supplementary File 1 PRISMA 2020 Checklist

| Item | Section | Reported | Location |
| --- | --- | --- | --- |
| 1 | Title | Yes | Title page |
| 2 | Abstract | Yes | Abstract |
| 3 | Rationale | Yes | Introduction ¶1–2 |
| 4 | Objectives | Yes | Introduction final ¶ |
| 5 | Eligibility | Yes | Methods 2.3 |
| 6 | Sources | Yes | Methods 2.2 |
| 7 | Search | Yes | Methods 2.2 + SF3 |
| 8 | Selection | Yes | Methods 2.4 |
| 9 | Data collection | Yes | Methods 2.4 |
| 10 | Data items | Yes | Methods 2.4 |
| 11 | Risk of bias | Yes | Methods 2.5 + SF4 |
| 12 | Effect measures | Yes | Methods 2.6 |
| 13 | Synthesis | Yes | Methods 2.6 |
| 14 | Certainty | Yes | Methods 2.6 |
| 15 | Study selection | Yes | Results 3.1 + SF2 |
| 16 | Characteristics | Yes | Results 3.1 |
| 17 | RoB results | Yes | SF4 |
| 18 | Individual results | Yes | Results 3.3–3.5 |
| 19 | Synthesis results | Yes | Results 3.3–3.5 |
| 20 | Certainty | Yes | Discussion |
| 21 | Interpretation | Yes | Discussion 4.1–4.2 |
| 22 | Limitations | Yes | Discussion 4.4 |
| 23 | Conclusions | Yes | Conclusion |
| 24 | Registration | Yes | Methods 2.1 |
| 25 | Competing interests | Yes | Statements |
| 26 | Funding | Yes | Statements |
| 27 | Data availability | Yes | Statements |
