# Supplementary material
Source: Research Square preprint supplement (doi:10.21203/rs.3.rs-10330665/v1)
Supplement: Supplementary file 4 [file 53778ec06b9b505c0382ce6a.docx]

# PRISMA 2020 for Abstracts Checklist

Completed for the systematic review manuscript.

| Item | Checklist item | Reported | Details |
| --- | --- | --- | --- |
| 1 | Title | Yes | Title includes "Systematic Review" |
| 2 | Objectives | Yes | Objective states characterization of phenotypes, time-to-onset profiles, and management strategies. |
| 3 | Eligibility criteria | Yes | PICOS framework described. |
| 4 | Information sources | Yes | PubMed, EMBASE, Scopus, and Google Scholar (2020–2026). |
| 5 | Risk of bias | Yes | RoB 2, Newcastle–Ottawa Scale, and JBI checklists. |
| 6 | Synthesis methods | Yes | Narrative synthesis; no meta-analysis due to heterogeneity. |
| 7 | Included studies | Yes | 42 studies; 18,432 patients. |
| 8 | Main results | Yes | Results summarized by phenotype categories. |
| 9 | Limitations | Yes | Limitations summarized in the abstract. |
| 10 | Conclusions | Yes | Phenotype-guided management and vigilance recommended. |
| 11 | Funding | Yes | No funding received. |
| 12 | Registration | Yes | Not registered; explained in Methods. |
