# Supplementary material
Source: Research Square preprint supplement (doi:10.21203/rs.3.rs-10330665/v1)
Supplement: Supplementary file 5 [file 59dfc7976665dd770ac6d00f.docx]

# Supplementary File 4 Risk of Bias Tables

## Table 1. Cochrane RoB 2

| Study | Randomization | Deviations | Missing Data | Outcome Measurement | Overall Risk |
| --- | --- | --- | --- | --- | --- |
| Zinman et al. 2015 | Low | Low | Low | Low | Low |
| Neal et al. 2017 | Low | Low | Low | Low | Low |
| Wiviott et al. 2019 | Low | Low | Low | Low | Low |

## Table 2. Newcastle-Ottawa Scale

| Study | Selection | Comparability | Outcome | Total | Quality |
| --- | --- | --- | --- | --- | --- |
| Bersoff-Matcha et al. 2019 | 3 | 2 | 2 | 7 | Good |
| Kridin & Bergman 2018 | 4 | 2 | 3 | 9 | Excellent |
| Hu et al. 2020 | 3 | 2 | 2 | 7 | Good |

## Table 3. JBI Critical Appraisal Checklist

| Study | Score | Overall |
| --- | --- | --- |
| Lee & Park 2024 | 8/10 | Low risk |
| Garcia et al. 2025 | 8/10 | Low risk |
| Patel et al. 2023 | 7/10 | Moderate risk |
