# Supplementary material
Source: Research Square preprint supplement (doi:10.21203/rs.3.rs-10330665/v1)
Supplement: Supplementary file 6 [file 5d03e5f29b994be81a8014b8.docx]

**PRISMA 2020 flow diagram for new systematic reviews which included searches of databases, registers and other sources**

IDENTIFICATION OF STUDIES VIA DATABASES AND REGISTERS

Records identified from*:

Databases (n = 1,203)

Registers (n = 0)

Records removed before screening:

Duplicate records removed (n = 356)

Records marked as ineligible by automation tools (n = 0)

Records removed for other reasons (n = 0)

Records screened (n = 847)

Records excluded** (n = 723)

Reports sought for retrieval (n = 124)

Reports not retrieved (n = 0)

Reports assessed for eligibility (n = 124)

Reports excluded:

Reason 1: Not original data (n = 34)

Reason 2: No explicit SGLT2i-associated CARs (n = 28)

Reason 3: Duplicate cohorts / overlapping populations (n = 12)

Reason 4: Non-English publications (n = 8)

Studies included in review (n = 42)

Studies included in quantitative synthesis (meta-analysis) (n = 0)

*Figure 1. PRISMA 2020 flow diagram showing the study selection process for the systematic review of SGLT2 inhibitor-induced cutaneous adverse reactions.*
