# Supplementary material
Source: Research Square preprint supplement (doi:10.21203/rs.3.rs-10330665/v1)
Supplement: Supplementary file 7 [file ff98386f9202031b56946ecf.docx]

# Supplementary File 3 Search Strategy

## PubMed

("SGLT2 inhibitor"[Title/Abstract] OR "sodium-glucose cotransporter-2 inhibitor"[Title/Abstract] OR "empagliflozin"[MeSH] OR "dapagliflozin"[MeSH] OR "canagliflozin"[MeSH]) AND ("cutaneous adverse reaction"[Title/Abstract] OR "skin rash"[Title/Abstract] OR "bullous pemphigoid"[MeSH] OR "Fournier gangrene"[MeSH] OR "Stevens-Johnson syndrome"[MeSH] OR "toxic epidermal necrolysis"[MeSH]) AND (2020/01/01:2026/01/31[pdat])

## EMBASE

('SGLT2 inhibitor'/exp OR 'empagliflozin'/exp OR 'dapagliflozin'/exp OR 'canagliflozin'/exp) AND ('skin rash'/exp OR 'bullous pemphigoid'/exp OR 'Stevens Johnson syndrome'/exp OR 'toxic epidermal necrolysis'/exp) AND [2020-2026]/py

## Scopus

TITLE-ABS-KEY("SGLT2 inhibitor*" OR "empagliflozin" OR "dapagliflozin" OR "canagliflozin") AND TITLE-ABS-KEY("skin rash" OR "bullous pemphigoid" OR "Fournier's gangrene" OR "Stevens-Johnson syndrome") AND PUBYEAR > 2019 AND PUBYEAR < 2027

## Google Scholar

allintitle: SGLT2 inhibitor OR empagliflozin OR dapagliflozin OR canagliflozin AND ("skin rash" OR "bullous pemphigoid" OR "Fournier's gangrene") after:2019 before:2027
